# Supplementary material
Source: PubMed Central journal article supplement (PMC2797173)
Supplement: supp_M109.049726_jbc.M109.049726-1.pdf [file supp_M109.049726_jbc.M109.049726-1.pdf]

| Scaffold | Compound                                                                          | K <sub>i</sub> of P2 (μM)                                                            | Δ(G <sup>0</sup> ) (kJ/mol) | Source             |     |
|----------|-----------------------------------------------------------------------------------|--------------------------------------------------------------------------------------|-----------------------------|--------------------|-----|
| A        | 1-deazaadenosine                                                                  | 45.4                                                                                 | -24.8                       | (1)                |     |
| A        | 1-deazapurine                                                                     | 131                                                                                  | -22.2                       | Aldrich            |     |
| A        | 2,6-diaminopurine-2'-d-ribose                                                     | 4.44                                                                                 | -30.6                       | MP<br>Biomedicals  |     |
| A        | 2-chloro-adenosine                                                                | 9.65                                                                                 | -28.6                       | TriLink<br>Biotech |     |
| A        | 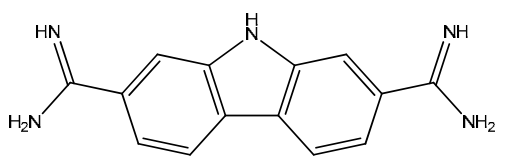 | 7.5                                                                                  | -29.3                       | (10)               |     |
| A        | 2'-deoxyadenosine                                                                 | 0.23                                                                                 | -37.9                       | Sigma              |     |
| A        | 2'-deoxyinosine                                                                   | 165                                                                                  | -21.6                       | Sigma              |     |
| A        | 2-hydroxy-6-aminopurine                                                           | 9.7                                                                                  | -28.6                       | Acros              |     |
| A        | 2-nitoradenosine                                                                  | 81                                                                                   | -23.4                       | (1)                |     |
| A        | 3-deaza-adenosine                                                                 | 0.29                                                                                 | -37.3                       | Sigma              |     |
| A        | 6-chloropurine riboside                                                           | 15.4                                                                                 | -27.5                       | TriLink<br>Biotech |     |
| A        | 8-azidoadenosine                                                                  | 331                                                                                  | -19.9                       | (8)                |     |
| A        | 8-bromoadenosine                                                                  | 37.8                                                                                 | -25.2                       | Acros              |     |
| A        | 9-dezaadenosine                                                                   | 12.2                                                                                 | -28                         | (7)                |     |
| A        | adenine                                                                           | 0.3                                                                                  | -37.2                       | Sigma              |     |
| A        | adenosine                                                                         | 0.92                                                                                 | -34.5                       | Sigma              |     |
| A        | allopurinol                                                                       | 255                                                                                  | -20.5                       | Sigma              |     |
| A        | DAPI                                                                              | 0.47                                                                                 | -36.1                       | Fluka              |     |
| A        | DB1208                                                                            |  | 0.37                        | -36.7              | (5) |
| A        | DB1464                                                                            |  | 0.15                        | -39                | (5) |
| A        | dilazep                                                                           | 150                                                                                  | -21.8                       | Sigma              |     |

|   |              |      |       |       |
|---|--------------|------|-------|-------|
| A | dipyridamole | 51.6 | -24.5 | Sigma |
| A | formycin A   | 36.5 | -25.3 | (8)   |
| A | hypoxanthine | 500  | -18.8 | Sigma |

|   |                                                                                   |   |       |     |
|---|-----------------------------------------------------------------------------------|---|-------|-----|
| A |  | 9 | -28.8 | (1) |
|---|-----------------------------------------------------------------------------------|---|-------|-----|

|   |                                                                                   |      |       |     |
|---|-----------------------------------------------------------------------------------|------|-------|-----|
| A |  | 19.9 | -26.8 | (1) |
|---|-----------------------------------------------------------------------------------|------|-------|-----|

|   |                                                                                     |      |       |       |
|---|-------------------------------------------------------------------------------------|------|-------|-------|
| A | 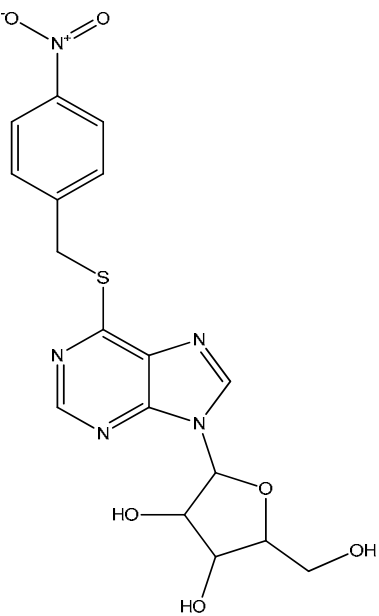    | 74.5 | -23.6 | Sigma |
| A | Nebularine (purine riboside)                                                        | 17.1 | -27.2 | Sigma |
| A | oxypurinol                                                                          | 303  | -20.1 | Sigma |
| A | purine                                                                              | 18.1 | -27.1 | Sigma |
| A |   | 16.2 | -27.3 | (3)   |
| A |  | 9.7  | -28.6 | (3)   |
| A | Tubercidin (7-dezaadenosine)                                                        | 3.81 | -30.9 | Fluka |

|   |                                                                                                |      |       |       |
|---|------------------------------------------------------------------------------------------------|------|-------|-------|
| A | 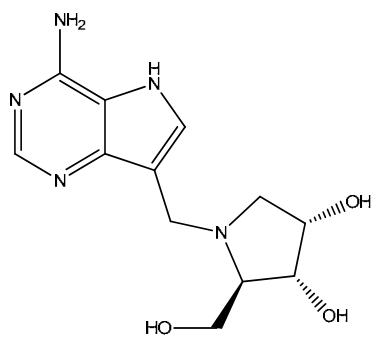              | 8.2  | -29   | (6)   |
| A |               | 125  | -22.3 | (6)   |
| A | xanthine                                                                                       | 106  | -22.7 | Sigma |
| B | 2-hydroxybenzamidine                                                                           | 2030 | -15.4 | Acros |
| B | 3-aminobenzamidine                                                                             | 722  | -17.9 | Acros |
| B | 4-aminobenzamidine                                                                             | 22.9 | -26.5 | Acros |
| B | benzamidine                                                                                    | 111  | -22.6 | Sigma |
| B | furamidine  | 1.19 | -33.8 | (5)   |
| B | DB103      | 31.4 | -25.7 | (5)   |
| B | DB1061     | 7.07 | -29.4 | (5)   |

|   |        |                                                                                     |      |       |     |
|---|--------|-------------------------------------------------------------------------------------|------|-------|-----|
| B | DB1064 | 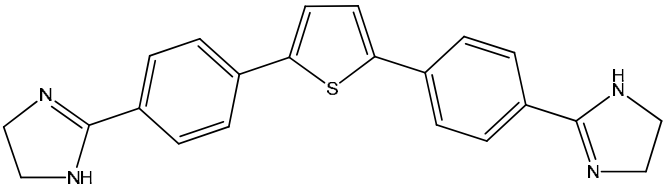   | 33.2 | -25.6 | (5) |
| B | DB1111 |   | 5.5  | -30   | (5) |
| B | DB1138 |   | 8.1  | -29.1 | (5) |
| B | DB1213 |   | 1.09 | -34   | (5) |
| B | DB1339 |   | 25   | -26.3 | (5) |
| B | DB1680 |  | 0.95 | -34.4 | (5) |

|   |       |                                                                                      |      |       |     |
|---|-------|--------------------------------------------------------------------------------------|------|-------|-----|
| B | DB244 | 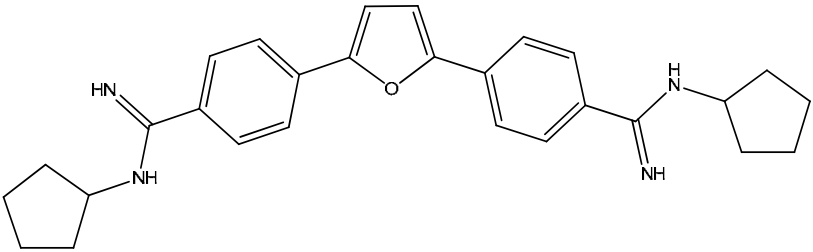    | 3.23 | -31.3 | (5) |
| B | DB249 |    | 4.49 | -30.5 | (5) |
| B | DB320 |     | 0.39 | -36.6 | (5) |
| B | DB544 |    | 3.02 | -31.5 | (5) |
| B | DB60  |  | 13.8 | -27.7 | (5) |
| B | DB607 |   | 4.1  | -30.8 | (5) |

|   |              |                                                                                     |      |       |       |
|---|--------------|-------------------------------------------------------------------------------------|------|-------|-------|
| B | DB629        | 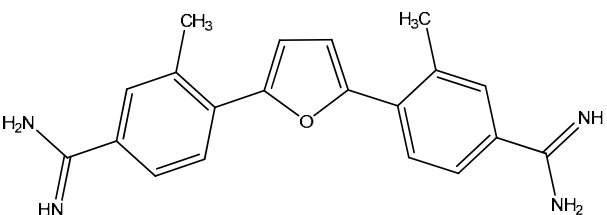    | 0.88 | -34.6 | (5)   |
| B | DB686        |   | 5.4  | -30.1 | (5)   |
| B | DB820        |    | 1.95 | -32.6 | (5)   |
| B | DB829        |    | 1.4  | -33.4 | (5)   |
| B | DB867        |   | 4    | -30.8 | (5)   |
| B | DB931        |  | 1.23 | -33.7 | (5)   |
| B | Distamycin A |  | 10.6 | -28.4 | Sigma |
| B |              |                                                                                     | 1.36 | -33.5 | (9)   |

|   |                                                                                     |      |       |      |
|---|-------------------------------------------------------------------------------------|------|-------|------|
| B | 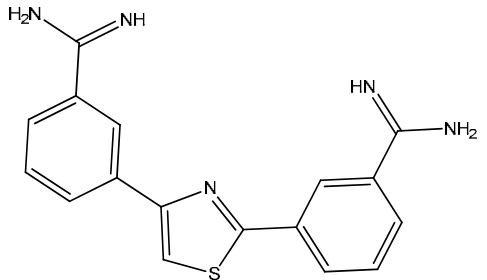   | 0.92 | -34.5 | (9)  |
| B |    | 3.92 | -30.9 | (9)  |
| C |    | 8.05 | -29.1 | (12) |
| C |   | 0.38 | -36.6 | (12) |
| C |  | 0.81 | -34.8 | (12) |
| C |  | 0.21 | -38.1 | (12) |



|   |                                                                                     |      |       |         |
|---|-------------------------------------------------------------------------------------|------|-------|---------|
| C | 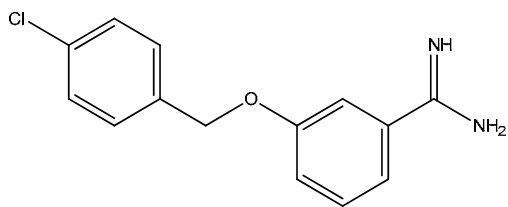    | 1.01 | -34.2 | (12)    |
| C |    | 1.57 | -33.1 | (12)    |
| C |    | 11.9 | -28.1 | (13)    |
| C |   | 59.3 | -24.1 | (13)    |
| C |  | 5.8  | -29.9 | (10)    |
| C | 2-aminopyridine                                                                     | 14.3 | -27.7 | Aldrich |
| C | 4,6-diaminopyrimidine                                                               | 3.22 | -31.3 | Aldrich |
| C | 4-aminopyridine                                                                     | 145  | -21.9 | Aldrich |
| C | 4-aminopyrimidine                                                                   | 137  | -22.1 | Acros   |
| C | 4-hydroxybenzamide                                                                  | 235  | -20.7 | Aldrich |

|   |                                                                                     |      |       |                |
|---|-------------------------------------------------------------------------------------|------|-------|----------------|
| C | butamidine                                                                          | 1.04 | -34.2 | (2)            |
| C | stilbamidine                                                                        | 2.42 | -32.1 | Sanofi-Aventis |
| D | 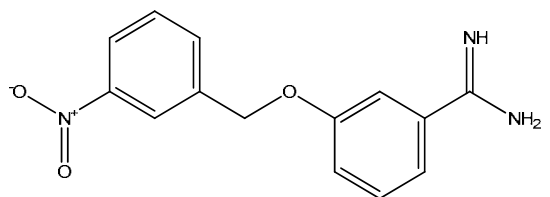   | 0.33 | -37   | (14)           |
| D |    | 129  | -22.2 | (14)           |
| D |    | 53.4 | -24.4 | (14)           |
| D |   | 4.6  | -30.5 | (14)           |
| D |  | 404  | -19.4 | (14)           |
| D |  | 13.1 | -27.9 | (14)           |

|   |                                                                                                                         |      |       |        |
|---|-------------------------------------------------------------------------------------------------------------------------|------|-------|--------|
| D | 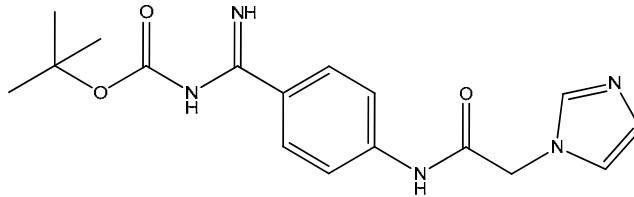                                        | 3.65 | -31   | (14)   |
| D |                                        | 1.58 | -33.1 | (14)   |
| D |                                        | 2.88 | -31.6 | (14)   |
| D | heptamidine                                                                                                             | 0.28 | -37.4 | (2)    |
| D | hexamidine                                                                                                              | 0.43 | -36.3 | (2)    |
| D | iodo-pentamidine                                                                                                        | 0.27 | -37.5 | (4)    |
| D | megazol                                                                                                                 | 192  | -21.2 | (15)   |
| D | octamidine                                                                                                              | 0.48 | -36.1 | (2)    |
| D | pentamidine                                                                                                             | 0.37 | -36.7 | Sigma  |
| D | propamidine                                                                                                             | 1.92 | -32.6 | (11)   |
| E | 1,1'-(nonane-1,9-diyl)diguandine<br> | 45.4 | -24.8 | Biomol |
| E |                                      | 200  | -21.1 | (9)    |
| E |                                      | 3.25 | -31.3 | (9)    |

|   |                                                                                    |      |       |                |
|---|------------------------------------------------------------------------------------|------|-------|----------------|
| E | 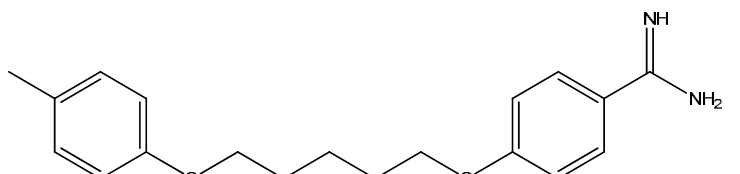   | 8.75 | -28.9 | (9)            |
| F |   | 9.3  | -28.7 | (12)           |
| F |   | 0.38 | -36.6 | (13)           |
| F |   | 0.38 | -36.6 | (12)           |
| F |  | 37.7 | -25.3 | (3)            |
| F | melarsen oxide                                                                     | 9.7  | -28.6 | Sanofi-Aventis |
| F | melarsoprol                                                                        | 0.54 | -35.8 | Sanofi-Aventis |
| F | thiamine                                                                           | 364  | -19.6 | Sigma          |
| G | aminopterin                                                                        | 78.4 | -23.4 | Sigma          |
| G | diminazene aceturate (berenil)                                                     | 2.36 | -32.1 | Sigma          |
| G | ethidium                                                                           | 5.96 | -29.8 | Sigma          |
| G | isometamidium                                                                      | 0.21 | -38.1 | May & Baker    |

- (1) Gift of Professor Gerrit-Jan Koomen, University of Amsterdam; Amsterdam, The Netherlands.  
(2) Gift of Professor Alan Fairlamb, University of Dundee; Dundee, UK.  
(3) Gift of Professor Katherine Radtke-Seley, University of Maryland, Baltimore Co; Baltimore, MA, USA.  
(4) Gift of Dr Philip Blower, University of Kent at Canterbury; Canterbury, UK.

- (5) Gift of Professor David Boykin, Georgia State University; Atlanta, GE, USA.
- (6) Gift of Professor Achiel Haemers, University of Antwerp; Antwerp, Belgium.
- (7) Gift of Professor Mahmoud H. el Kouni, University of Alabama at Birmingham; Birmingham, AL, USA.
- (8) Gift of Professor Simon Jarvis, University of Westminster; London, UK.
- (9) Gift of Dr Paul O'Neil, University of Liverpool; Liverpool, UK.
- (10) Gift of Professor Richard Tidwell, University of North Carolina, Chapel Hill; NC, USA.
- (11) Gift from Dr Christophe Dardonville, Instituto de Química Médica; Madrid, Spain.
- (12) Gift from Professor Ian Gilbert, University of Dundee, UK; see Stewart et al. (2005) *Antimicrob. Ag. Chemother.* 49, 5169-5171.
- (13) Gift from Professor Ian Gilbert, University of Dundee, UK; see Tye et al (1998) *Bioorg Med Chem Lett* 8, 811-816 and Klenke et al. (2001) *J. Med. Chem.* 44, 3440-3352.
- (14) Gift from Professor Ian Gilbert, University of Dundee, UK; see Stewart et al (2004) *Antimicrob. Ag. Chemother.* 48, 1733-1738 and Baliani et al (2005) *J. Med. Chem.* 48, 5570-5579.
- (15) Gift from Professor Bernard Bouteille, Institut d'Epidémiologie Neurologique et de Neurologie Tropicale, Limoges, France.
