# Supplementary material
Source: PubMed Central journal article supplement (PMC2797173)
Supplement: supp_M109.049726_jbc.M109.049726-2.pdf [file supp_M109.049726_jbc.M109.049726-2.pdf]

**Supplementary Table 2.** Listing of  $K_i$  values, Gibbs free energy  $\Delta G^0$  and energy gain/loss relative to a control compound for some of the compounds utilised in this study and listed in Supplementary Table 1. Conclusions drawn from the data with respect to substrate binding of the P2 transporter are listed in the final column.

| Compound                             | $K_i$ value<br>( $\mu\text{M}$ ) | $\Delta(G^0)$<br>(KJ/mol) | $\delta(\Delta(G^0))$<br>(KJ/mol) | Relative to           | Conclusion                                                                                                                        |
|--------------------------------------|----------------------------------|---------------------------|-----------------------------------|-----------------------|-----------------------------------------------------------------------------------------------------------------------------------|
| <b>Adenosine</b>                     | $0.92 \pm 0.06$                  | 34.5                      |                                   | N/A                   |                                                                                                                                   |
| <b>Position 1</b>                    |                                  |                           |                                   |                       | Average contribution = 7.7 kJ/mol to binding the purine ring                                                                      |
| 1-Deazaadenosine                     | $45.4 \pm 8.7$                   | 24.8                      | 9.7                               | Adenosine             | N1 contributes of 9.7 kJ/mol to binding of adenosine                                                                              |
| 1-Deazapurine                        | $181 \pm 33$                     | 21.4                      | 5.7                               | Purine                | N1 contributes of 5.7 kJ/mol to binding of adenine                                                                                |
| <b>Position 2</b>                    |                                  |                           |                                   |                       | Depending on the group, substitutions on position reduce binding energy of adenosine analogs with 5 – 11 kJ/mol                   |
| 2-Nitroadenosine                     | $81 \pm 22$                      | 23.4                      | 11.1                              | Adenosine             |                                                                                                                                   |
| 2-Hydroxy-6-aminopurine              | $9.7 \pm 2.3$                    | 28.6                      | 8.7                               | Adenine               |                                                                                                                                   |
| 2,6-Diamino, 2'-deoxypurine riboside | $4.4 \pm 1.3$                    | 30.5                      | 7.4                               | 2'-<br>Deoxyadenosine |                                                                                                                                   |
| 2-Chloroadenosine                    | $9.7 \pm 3.4$                    | 28.6                      | 5.9                               | Adenosine             |                                                                                                                                   |
| <b>Position 3</b>                    |                                  |                           |                                   |                       | N3 does not contribute to binding. Its removal re-distributes charge around the molecule, resulting in a slightly higher affinity |
| 3-deazaadenosine                     | $0.29 \pm 0.06$                  | 37.3                      | -2.8                              | Adenosine             |                                                                                                                                   |

|                                                                                    |            |      |      |                   |                                                                                                                                                                                                                                                    |
|------------------------------------------------------------------------------------|------------|------|------|-------------------|----------------------------------------------------------------------------------------------------------------------------------------------------------------------------------------------------------------------------------------------------|
| <b>Position 6</b>                                                                  |            |      |      |                   | The 6-NH <sub>2</sub> group contributes an average of 8.2 kJ/mol to binding of aminopurines                                                                                                                                                        |
| 6-chloropurine riboside                                                            | 15.4 ± 0.8 | 27.5 | 7.0  | Adenosine         |                                                                                                                                                                                                                                                    |
| Purine                                                                             | 18.1 ± 3.2 | 27.1 | 10.2 | Adenine           |                                                                                                                                                                                                                                                    |
| Purine riboside                                                                    | 17.1 ± 2.1 | 27.2 | 7.3  | Adenosine         |                                                                                                                                                                                                                                                    |
|                                                                                    |            |      |      |                   |                                                                                                                                                                                                                                                    |
| <b>Positions 6 and 1</b>                                                           |            |      |      |                   | The binding energies of positions 1 and 6 are additive, resulting in very low affinity for inosine and guanosine, and is estimated at 15.7 kJ/mol.                                                                                                 |
| Guanosine                                                                          | >500       |      |      |                   |                                                                                                                                                                                                                                                    |
| Inosine                                                                            | >500       |      |      |                   |                                                                                                                                                                                                                                                    |
| 2'-deoxyinosine                                                                    | 165 ± 23   | 21.6 | 16.3 | 2'-Deoxyadenosine |                                                                                                                                                                                                                                                    |
| 1-deazapurine                                                                      | 131 ± 34   | 22.2 | 15.1 | Adenine           |                                                                                                                                                                                                                                                    |
|                                                                                    |            |      |      |                   |                                                                                                                                                                                                                                                    |
| <b>Positions 6 and 2</b>                                                           |            |      |      |                   |                                                                                                                                                                                                                                                    |
| 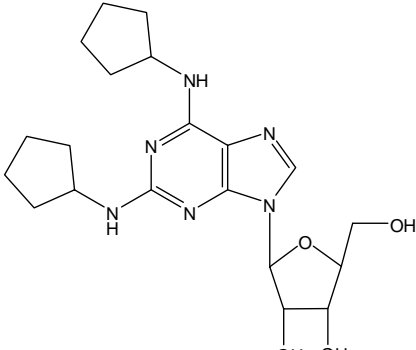 | 20 ± 9.2   |      | 7.6  | Adenosine         | Loss of affinity can be attributed solely to the substitution on position 2 (see above). The single substitution at the 6-amine position is therefore not (greatly) detrimental to binding, especially when the substitution is small or flexible. |

|                                                                                   |                 |      |      |           |                                                                                                                                                                      |
|-----------------------------------------------------------------------------------|-----------------|------|------|-----------|----------------------------------------------------------------------------------------------------------------------------------------------------------------------|
| 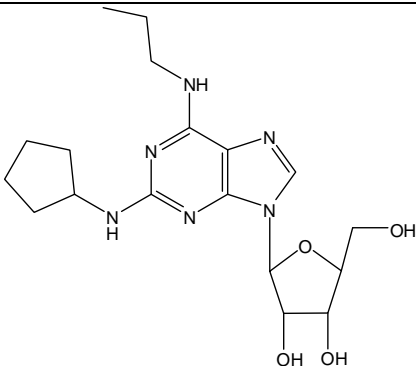 | $9.0 \pm 1.7$   |      | 5.7  | Adenosine |                                                                                                                                                                      |
| <b>Position 7</b>                                                                 |                 |      |      |           |                                                                                                                                                                      |
| 7-deazaadenosine (tubercidin)                                                     | $3.8 \pm 0.7$   | 30.9 | 3.6  | Adenosine | Small apparent contribution to binding from N7, though too small to represent a full hydrogen bond. The absence of N7, however, decreases the positive charge on N9. |
| Formycin A                                                                        | $36.5 \pm 6.6$  | 25.3 | 9.2  | Adenosine |                                                                                                                                                                      |
| <b>Position 8</b>                                                                 |                 |      |      |           | Substitutions at position 8 are detrimental to binding.                                                                                                              |
| 8-azidoadenosine                                                                  | $331 \pm 142$   | 19.9 | 14.6 | Adenosine |                                                                                                                                                                      |
| 8-bromoadenosine                                                                  | $37.8 \pm 8.2$  | 25.2 | 9.2  | Adenosine |                                                                                                                                                                      |
| <b>Position 9</b>                                                                 |                 |      |      |           |                                                                                                                                                                      |
| 9-dezaadenosine                                                                   | $12.1 \pm 3.2$  | 28.1 | 6.4  | Adenosine | Significant contribution of N9 to adenosine binding.                                                                                                                 |
| <b>Ribose</b>                                                                     |                 |      |      |           | Absence of the ribose or of just the 2'-hydroxyl group increases affinity by approximately 3 kJ/mol.                                                                 |
| Adenine                                                                           | $0.30 \pm 0.02$ | 37.3 | -2.8 | Adenosine |                                                                                                                                                                      |
| 2'-deoxyadenosine                                                                 | $0.23 \pm 0.04$ | 37.9 | -3.4 | Adenosine |                                                                                                                                                                      |

|                                                                                   |                 |      |      |             |                                                                                                                                                                                                                                                                                                                                                                                                                             |
|-----------------------------------------------------------------------------------|-----------------|------|------|-------------|-----------------------------------------------------------------------------------------------------------------------------------------------------------------------------------------------------------------------------------------------------------------------------------------------------------------------------------------------------------------------------------------------------------------------------|
| <b>Aromaticity</b>                                                                |                 |      |      |             | The aromaticity of the purines and diamidines contributes importantly to their high affinity binding of P2, as non-aromatic diamidines or diguanidines of similar length and flexibility as the aromatic diamidines display ~100-fold less affinity, corresponding to 10-11 kJ/mol in binding energy. Presumably $\pi$ - $\pi$ -bonds with aromatic amino acid residues are involved in substrate-transporter interactions. |
| 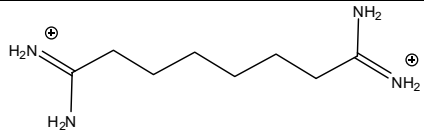 | >200            |      |      |             |                                                                                                                                                                                                                                                                                                                                                                                                                             |
|  | $45 \pm 15$     | 24.7 | 11.9 | Pentamidine |                                                                                                                                                                                                                                                                                                                                                                                                                             |
| Pentamidine                                                                       | $0.37 \pm 0.04$ | 36.7 |      |             |                                                                                                                                                                                                                                                                                                                                                                                                                             |
| Propamidine                                                                       | $1.9 \pm 0.8$   | 32.6 |      |             |                                                                                                                                                                                                                                                                                                                                                                                                                             |
| Stilbamidine                                                                      | $2.4 \pm 0.3$   | 32.0 |      |             |                                                                                                                                                                                                                                                                                                                                                                                                                             |
